# Supplementary material for: Novel small-molecule compound YH7 inhibits the biofilm formation of Staphylococcus aureus in a sarX-dependent manner
Source: PubMed Central journal article supplement (PMC10826350; doi:10.1128/msphere.00564-23), 2024-01-03
Supplement: msphere.00564-23-s0001.pdf [file msphere.00564-23-s0001.pdf]

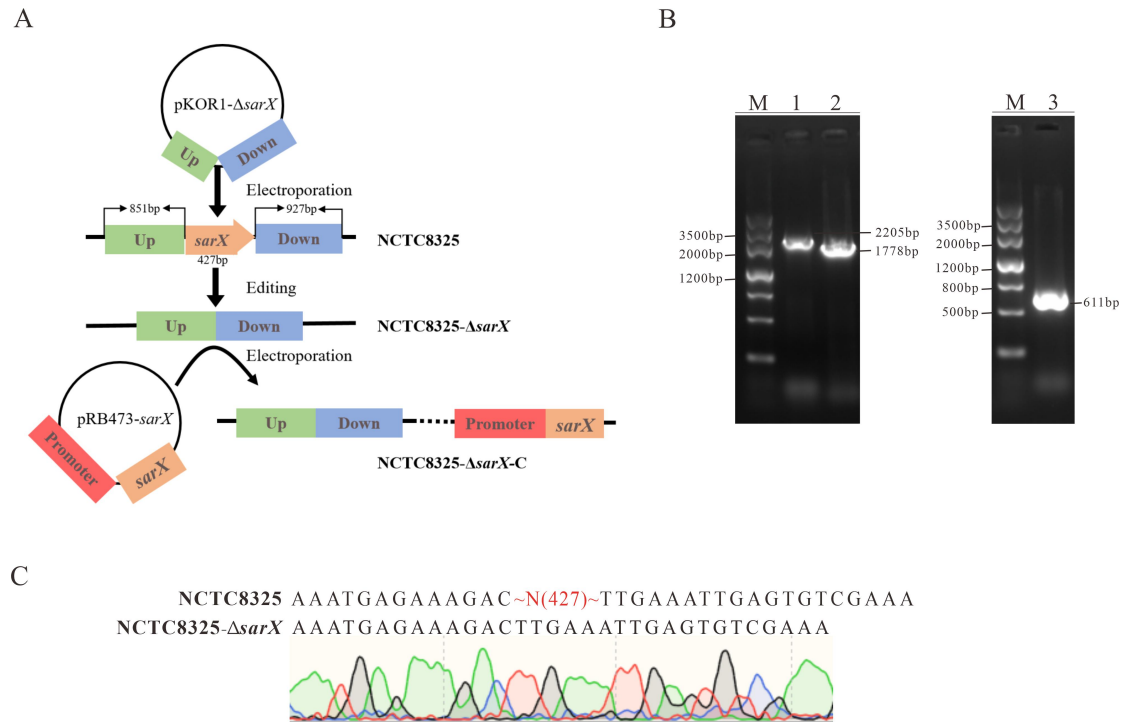

**Figure S1.** Identification of  $\Delta sarX$  and  $\Delta sarX-C$  strains. (A) Schematic model of construction of  $\Delta sarX$  and  $\Delta sarX-C$ . (B) PCR identification of  $\Delta sarX$  and  $\Delta sarX-C$ . M: DNA marker; 1: WT; 2:  $\Delta sarX$ ; 3:  $\Delta sarX-C$ . (C) DNA sequencing result for the validation of  $\Delta sarX$ .
